# Supplementary material for: The Mars–Van Krevelen cycle and non-noble metal Ni jointly promoting Z-scheme charge transfer: a study on the photothermal synergy effect applied in selectively oxidizing aromatic alcohols
Source: Royal Society of Chemistry journal article supplement (doi:10.1039/d3nr03540a), 2023-01-01

## **Mars-Van Krevelen cycle and non-noble metal Ni jointly promoting Z-scheme charge transfer: Study on photothermal synergy effect applied in selectively oxidating aromatic alcohols**

Gaoli Chen<sup>a</sup>, Jing Li<sup>a</sup>, Shu Gui<sup>a</sup>, Ya Wang<sup>a</sup>, Sujuan Zhang<sup>a,\*</sup>, Zhongliao Wang<sup>a</sup>, Xiuzhen Zheng<sup>a</sup>, Sugang Meng<sup>a</sup>, Chaohui Ruan<sup>a</sup>, Shifu Chen<sup>a,\*</sup>

<sup>a</sup> Key Laboratory of Green and Precise Synthetic Chemistry and Applications, Ministry of Education, Anhui Province Key Laboratory of Pollutant Sensitive Materials and Environmental Remediation, College of Chemistry and Material Science, Huaibei Normal University, Huaibei, 235000, People's Republic of China.

\*Corresponding Authors, Tel: +86-561-3802061, Fax: +86-561-3802061. E-mail: zhangsjuancgl@163.com, chshifu@chnu.edu.cn.

### **Experimental reagents**

Cadmium nitrate tetrahydrate ( $\text{Cd}(\text{NO}_3)_2 \cdot 4\text{H}_2\text{O}$ ), thioacetamide ( $\text{C}_2\text{H}_5\text{NS}$ ), ethylenediamine ( $\text{C}_2\text{H}_4(\text{NH}_2)_2$ ), Cerium nitrate hexahydrate ( $\text{Ce}(\text{NO}_3)_3 \cdot 6\text{H}_2\text{O}$ ), sodium hydroxide ( $\text{NaOH}$ ), nickelous nitrate hexahydrate ( $\text{Ni}(\text{NO}_3)_2 \cdot 6\text{H}_2\text{O}$ ), Trifluoro toluene (BTF), Deionized water, benzyl alcohol ( $\text{C}_6\text{H}_5\text{CH}_2\text{OH}$ ,  $\geq 99.0\%$ ), benzaldehyde ( $\text{C}_6\text{H}_5\text{CHO}$ ,  $\geq 99.0\%$ ). All of these are analytical reagents without further purification.

### **Material characterization**

X-ray diffraction (XRD) patterns of the prepared photocatalysts were detected by a Bruker D8 X-ray powder diffractometer using  $\text{Cu K}\alpha$  radiation at room temperature. UV-visible diffuse reflection spectra (UV-Vis DRS) were conducted on a TU-1950 Vis-NIR spectrophotometer (TU-1950, Persee) with  $\text{BaSO}_4$  as a reference. Field emission scanning electron microscopy (FESEM) images were studied on a FEI Quanta 650 scanning electron microscope. The morphologies and microstructures of the photocatalysts were determined by transmission electron microscopy (TEM, FEI Tecnai G2 F20) and high-resolution transmission electron microscopy (HRTEM) at an accelerating voltage of 200 kV, elemental mappings were performed using an

energy-dispersive X-ray spectrometer (EDS) attached to the TEM instrument. X-ray photoelectron spectroscopy (XPS) analysis was performed on an ESCALAB 250 photoelectron spectrometer (Thermo Fisher Scientific) equipped with an Al K $\alpha$  X-ray beam (1486.6 eV). The binding energies were corrected with reference to the C 1s peak of the surface adventitious carbon at 284.6 eV. The Brunauer-Emmett-Teller (BET) data of the samples was obtained by N<sub>2</sub> adsorption-desorption at 77.3 K using a Micromeritics ASAP 2460 instrument. Photoluminescence (PL) emission spectra were recorded on a JASCO FP-6500 type fluorescence spectrophotometer and time-resolved photoluminescence spectroscopy (TR-PL) was recorded on an Edinburgh FS5 fluorescence spectrophotometer. In situ diffuse reflectance infrared Fourier transform spectroscopy (DRIFT) measurements were performed on a Nicolet 8700 FTIR spectrometer using a KBr window.

The photoelectrochemical tests were implemented on a three-electrode system (CHI-660E, Chenhua Instruments Co., China). A Pt wire and Ag/AgCl were used as the counter electrode and reference electrode, respectively. The sample powder was deposited on the fluoride tin oxide (FTO) substrate to serve as a working electrode. The electrodes were prepared as follows. The 5 mg sample was dispersed in 400  $\mu$ L of deionized water. Then, the 20  $\mu$ L slurry was deposited as a film on a 0.5 cm  $\times$  0.5 cm FTO substrate. After being dried at room temperature, the working electrode was obtained. Moreover, photocurrent response of the sample was detected in a 0.2 M Na<sub>2</sub>SO<sub>4</sub> aqueous solution, EIS Nyquist plots of the samples were detected in 0.1 M KCl solution containing 0.1 M K<sub>3</sub>[Fe(CN)<sub>6</sub>]/K<sub>4</sub>[Fe(CN)<sub>6</sub>].

### **Computational detail:**

DFT calculations were conducted through the Vienna ab initio Simulation Package (VASP) with the projector augmented wave method. The generalized gradient approximation of the Perdew-Burke-Ernzerhof (PBE) functional was used as the exchange-correlation functional. The cutoff energy was set as 500 eV, and structure relaxation was performed until the convergence criteria of energy and force reached  $1 \times 10^{-5}$  eV and 0.02 eV  $\text{\AA}^{-1}$ , respectively. A vacuum layer of 15  $\text{\AA}$  was constructed to

eliminate interactions between periodic structures of surface models. The van der Waals (vdW) interaction was amended by the zero damping DFT-D3 method of Grimme. The Gibbs free energy was calculated as  $\Delta G = \Delta E + \Delta E_{ZPE} - T\Delta S$ , where the  $\Delta E$ ,  $\Delta E_{ZPE}$ , and  $\Delta S$  are electronic energy, zero-point energy, and entropy difference between products and reactants. The zero-point energies of isolated and absorbed intermediate products were calculated from the frequency analysis. The vibrational frequencies and entropies of molecules in the gas phase were obtained from the National Institute of Standards and Technology (NIST) database.

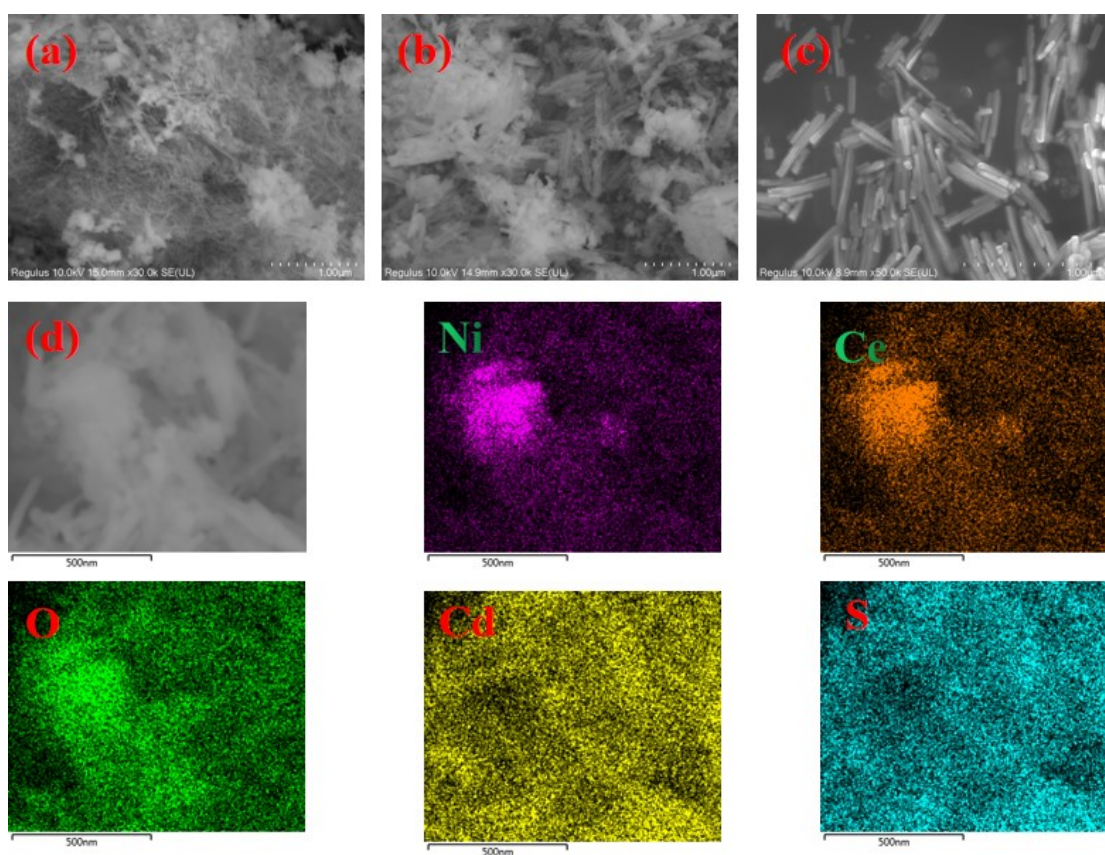

**Fig. S1.** SEM images of (a) NCO, (b) 60% NCO/CdS, (c) CdS, (d) EDS mapping of 60% NCO/CdS.

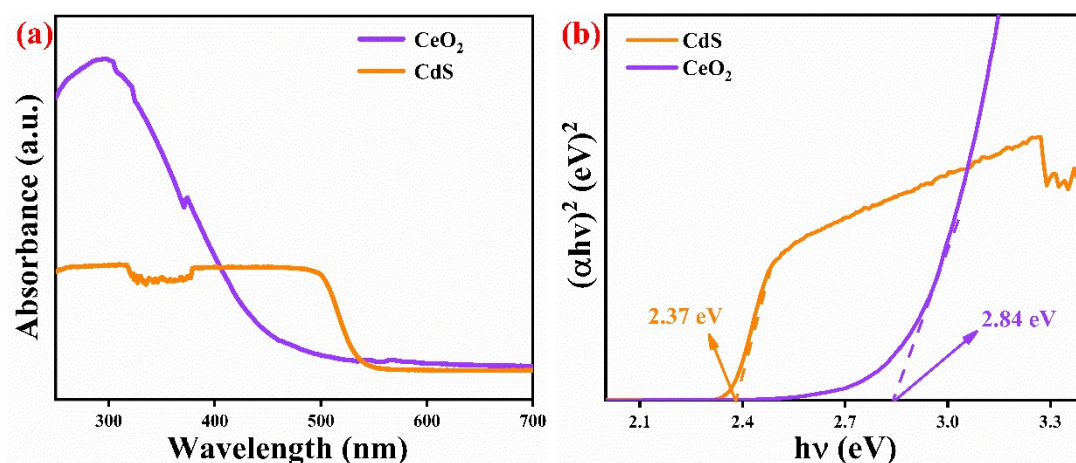

Fig. S2. (a) UV-Vis DRS spectrum, (b) the band gap energy of CeO<sub>2</sub> and CdS.

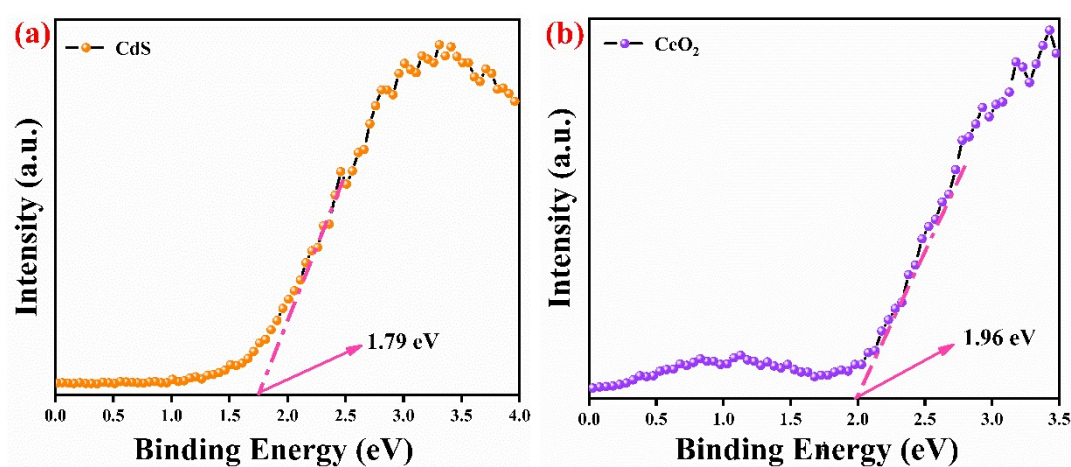

Fig. S3. VB-XPS of (a) CdS, (b) CeO<sub>2</sub>.

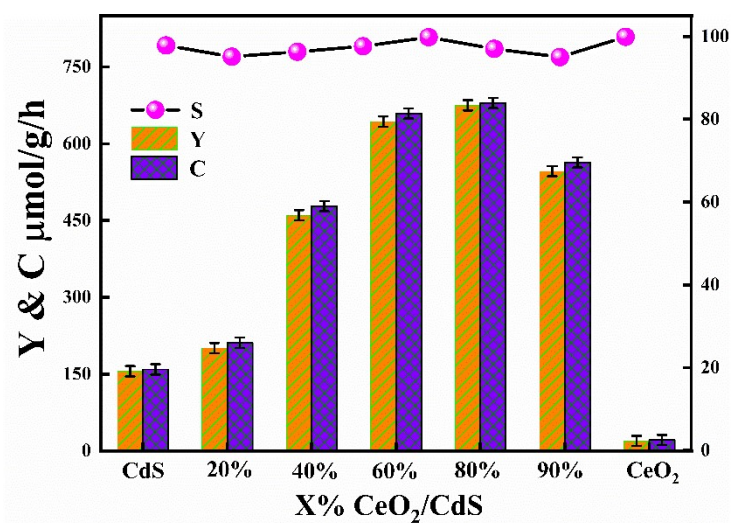

Fig. S4. Catalytic activity of X% CeO<sub>2</sub>/CdS.



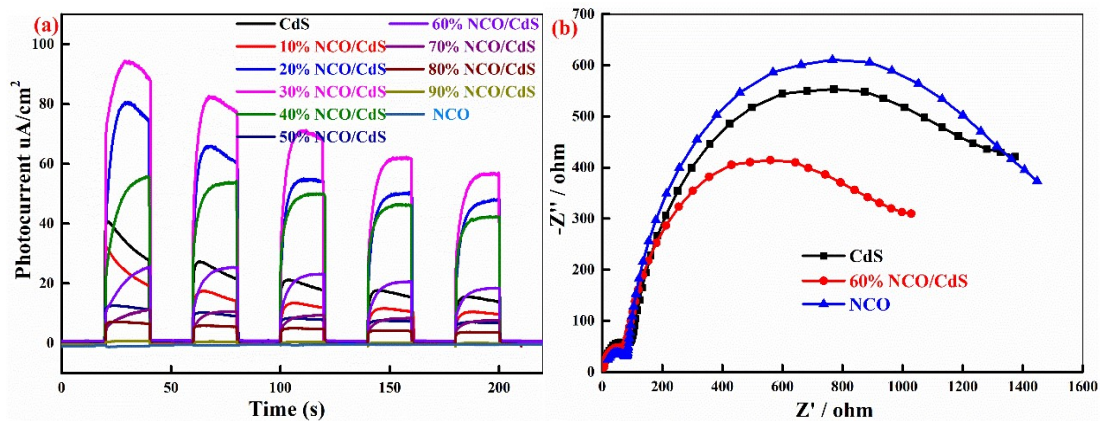

Fig. S5. (a) Photocurrent response of X% NCO/CdS, (b) EIS of X% NCO/CdS.

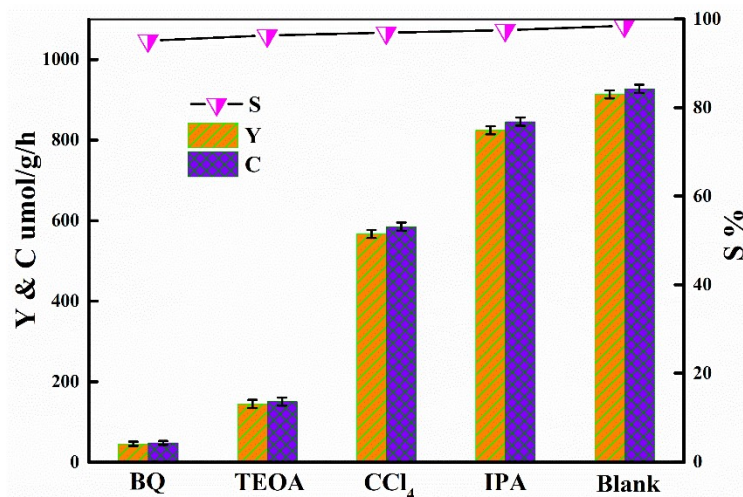

Fig. S6. Catalytic activity of 60% NCO/CdS selective oxidizing benzyl alcohol to benzaldehyde with different scavengers under visible light (363.15 K).

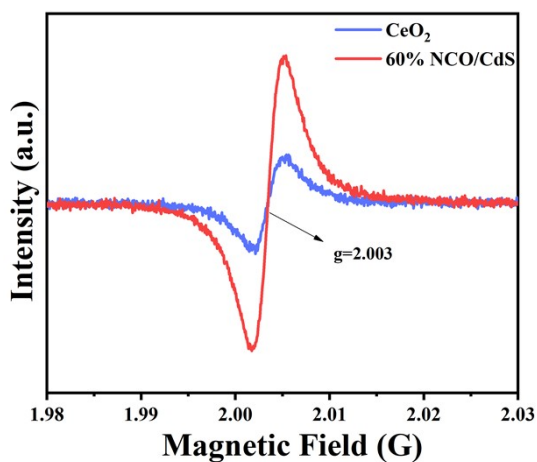

Fig. S7. The EPR results of  $\text{CeO}_2$  and 60% NCO/CdS.

**Table S1.** Reported studies on the selective oxidation of benzyl alcohol.

| Catalysts                                                                 | Reaction solutions                          | Reaction conditions                       | Conv. ( $\mu\text{mol/g/h}$ ) | Sel. (%) | Ref.      |
|---------------------------------------------------------------------------|---------------------------------------------|-------------------------------------------|-------------------------------|----------|-----------|
| $\text{g-C}_3\text{N}_4$                                                  | 50 mg catalyst<br>10 mL 0.02 mol/L BA/BTF   | 373 K, 0.1 Mpa<br>$\text{O}_2$ , 4 h      | 230                           | 98       | [1]       |
| $\text{Bi}_2\text{MoO}_6$                                                 | 16 mg catalyst<br>0.1 mmol BA, 1.5 mL BTF   | 298 K, 0.1 Mpa<br>$\text{O}_2$ , 4 h      | 414.06                        | >99      | [2]       |
| 10% $\text{Mn}_3\text{O}_4$ /<br>$\text{Cd}_{0.9}\text{Zn}_{0.1}\text{S}$ | 100 mg catalyst<br>15 mL 0.02 mol/L BA/BTF  | 353 K, 0.1 Mpa<br>$\text{O}_2$ , 4 h      | 377.25                        | 100      | [3]       |
| 50% $\text{Cr}_2\text{O}_3$ -<br>$\text{Al}_2\text{O}_3/\text{CdS}$       | 100 mg catalyst<br>15 mL 0.038 mol/L BA/BTF | 353 K, 0.1 Mpa<br>$\text{O}_2$ , 4 h      | 742.43                        | 99       | [4]       |
| $\text{CdIn}_2\text{S}_4$                                                 | 80 mg catalyst, 15 mL 0.0255 mol/L BA/BTF   | 333 K, 0.1 Mpa<br>$\text{N}_2$ , 4 h      | 689.69                        | 83.6     | [5]       |
| $\text{CdS}/$<br>$\text{g-C}_3\text{N}_4$                                 | 100 mg catalyst, 15 mL 0.0255 mol/L BA/BTF  | 333 K, 0.1 Mpa<br>$\text{N}_2$ , 4 h      | 426.48                        | 93       | [6]       |
| 60%<br>$\text{NCO}/\text{CdS}$                                            | 100 mg catalyst<br>15 mL 0.038 mol/L BA/BTF | 363.15 K,<br>atmospheric<br>pressure, 4 h | 913.45                        | 100      | This work |

- [1] L. Zhang, D. Liu, J. Guan, X. Chen, X. Guo, F. Zhao, T. Hou and X. Mu, *Mater. Res. Bull.*, 2014, 59, 84–92.
- [2] K. Jing, J. Xiong, N. Qin, Y. Song, L. Li, Y. Yu, S. Liang and L. Wu, *Chem. Commun.*, 2017, 53, 8604–8607.
- [3] S. Gui, S. Zhang, G. Chen, Z. Zhu, X. Zheng, S. Meng, C. Ruan and S. Chen, *Appl. Surf. Sci.*, 2021, 579, 151978.
- [4] S. Meng, S. Chang and S. Chen, *ACS Appl. Mater. Interfaces*, 2020, 12, 2531–2538.
- [5] X. Ye, Y. Chen, C. Ling, R. Ding, X. Wang, X. Zhang and S. Chen, *Dalton Trans.*, 2018, 47, 10915–10924.
- [6] X. Ye, X. Dai, S. Meng, X. Fu and S. Chen, *Chinese J. Chem.*, 2017, 35, 217–225.

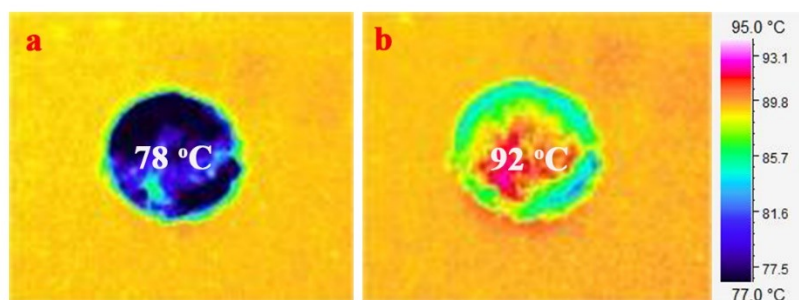

Fig. S8 Surface temperatures of 60% NCO/CdS (heating platform: 363.15 K (90 °C)): (a) without illumination, (b) illumination. Orange background is the temperature (about 90 °C) of the heating platform.

### CdS (001)

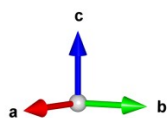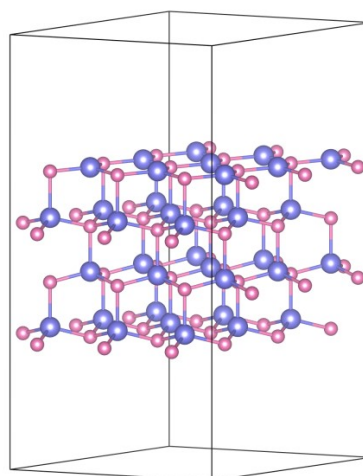

### CeO<sub>2</sub> (111)

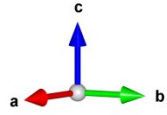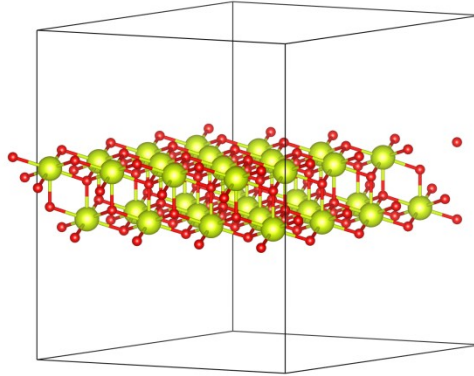

**Ni (111)**

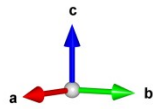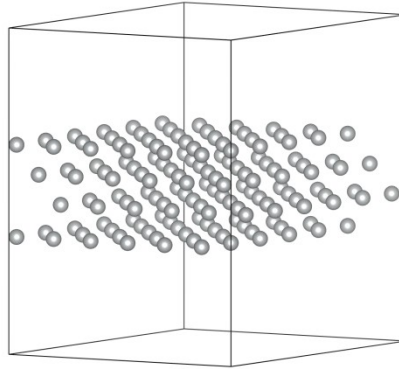

Supplement: d3nr03540a1.pdf [file d3nr03540a1.pdf]
